# Supplementary material for: The accommodative ciliary muscle function is preserved in older humans
Source: PubMed Central journal article supplement (PMC4858807; doi:10.1038/srep25551), 2016-05-06
Supplement: srep25551-s1.pdf [file srep25551-s1.pdf]

# **TITLE: The accommodative ciliary muscle function is preserved in older humans**

Authors: Juan Tabernero<sup>1\*</sup>, Emmanuel Chirre<sup>1</sup>, Lucia Hervella<sup>1</sup>, Pedro Prieto<sup>1</sup>, and Pablo Artal<sup>1</sup>

<sup>1</sup>Laboratorio de Óptica, Universidad de Murcia, Murcia, Spain;

## **Supplementary Video Information**

### **Movie clips legends**

**Supplementary video S1.** IOL wobbling under natural accommodated conditions (upper clip) and after paralyzing the activity of the ciliary muscle (down). This sequence corresponds to subject #1 performing a 9 degree saccade under both conditions.

**Supplementary video S2.** IOL wobbling under natural accommodated conditions (upper clip) and after paralyzing the activity of the ciliary muscle (down). This sequence corresponds to subject #2 performing a 9 degree saccade under both conditions.

**Supplementary video S3.** IOL wobbling under natural accommodated conditions (upper clip) and after paralyzing the activity of the ciliary muscle (down). This sequence corresponds to subject #3 performing a 9 degree saccade under both conditions.
